# Supplementary material
Source: publisher figshare collection journal article supplement (https://acs.figshare.com/ndownloader/files/3960277)
Supplement: Supplementary file 1 [file 3960277]

## Supporting Information

### **Surface tension measurements for seven imidazolium based dialkylphosphate ionic liquids and their binary mixtures with water (methanol or ethanol) at 298.15 K and 1 atm**

Nan-nan Ren<sup>†,‡</sup>, Yin-hui Gong<sup>†,‡</sup>, Ying-zhou Lu<sup>‡</sup>, Hong Meng<sup>‡</sup>, Chun-xi Li<sup>\*,†,‡</sup>

<sup>†</sup> State Key Laboratory of Chemical Resource Engineering, Beijing University of Chemical Technology, Beijing 100029, P. R. China, <sup>‡</sup> College of Chemical Engineering, Beijing University of Chemical Technology, Beijing 100029, P. R. China

---

\* To whom correspondence should be addressed. E-mail: Licx@mail.buct.edu.cn, Tel. & Fax: +86 10 64410308.

<sup>†</sup> State Key Lab of Chemical Resource Engineering.

<sup>‡</sup> College of Chemical Engineering.

## 1. Experimental

### 1.1 NMR analysis of ILs

$^1\text{H}$  and  $^{13}\text{C}$  NMR spectra were performed in order to characterize the structure and confirm the purity of the ILs, namely 1,3-dimethylimidazolium dimethylphosphate ([MMIM][DMP]), 1-ethyl-3-methylimidazolium dimethylphosphate ([EMIM][DMP]), 1-n-butyl-3-methylimidazolium dimethylphosphate ([BMIM][DMP]), 1-ethyl-3-methylimidazolium diethylphosphate ([EMIM][DEP]), 1,3-diethylimidazolium diethylphosphate ([EEIM][DEP]), 1-n-butyl-3-ethylimidazolium diethylphosphate ([BEIM][DEP]), and 1-n-butyl-3-methylimidazolium dibutylphosphate ([BMIM][DBP]).

The  $^1\text{H}$  and  $^{13}\text{C}$  NMR spectra were measured on an AV400 MHz spectrometer, using deuterated water ( $\text{D}_2\text{O}$ ) as the external reference solvent at  $T = 300$  K. Chemical shifts ( $\delta$ ) were reported in parts per million (ppm).

### 1.2 Water content determination

Water content was measured by the Karl Fisher titrator (type CBS-1A) for the above ILs, namely [MMIM][DMP], [EMIM][DMP], [BMIM][DMP], [EMIM][DEP], [EEIM][DEP], [BEIM][DEP], and [BMIM][DBP].

## 2. Results and Discussion

### 2.1 NMR analysis of ILs

The structures of the ILs were identified and no impurities were observed according to  $^1\text{H}$  NMR and  $^{13}\text{C}$  NMR spectra which are presented in Figs. S1–S7 and Figs. S8–S14, respectively.

The purity of ILs can be quantitatively determined according to the  $^1\text{H}$  NMR spectrum by the area normalization method, using the hydrogen numbers of IL divide the total hydrogen numbers.

For example (see Fig. S2), the purity of [EMIM][DMP] is,  $100 \times (1.00 + 0.97 + 0.95 + 2.39 + 3.50 + 6.62 + 3.46) / (1.00 + 0.97 + 0.95 + 2.39 + 3.50 + 6.62 + 3.46 + 0.17) = 99.1\%$ , which can also be qualitatively confirmed by the  $^{13}\text{C}$  NMR spectrum (see Fig. S9). It is obvious that no residual peaks of impurities are detected. Therefore, the purity determined by the NMR spectra actually represents the mole fraction of [EMIM][DMP], namely,  $x \geq 99.1\%$ .

The purity of the remaining ILs can be determined by the same method described above as well and the results are shown in Tab. S1 below.

**Tab. S1.** The purity of phosphate ionic liquids investigated

| ILs         | Purity (x%) |
|-------------|-------------|
| [MMIM][DMP] | 99.7        |
| [EMIM][DMP] | 99.1        |
| [BMIM][DMP] | 99.9        |
| [EMIM][DEP] | 99.8        |
| [EEIM][DEP] | 99.7        |
| [BEIM][DEP] | 99.9        |
| [BMIM][DBP] | 99.8        |

### Figure Captions

**Fig. S1.** The chemical shifts of  $^1\text{H}$  NMR spectra of [MMIM][DMP] with  $\text{D}_2\text{O}$  as the external reference solvent are recorded as follows:  $\delta_H = 3.47$  (6H, d,  $\text{P}(\text{OCH}_3)_2$ ), 3.80 (6H, s,  $\text{H}_3\text{CNCHNCH}_3$ ), 7.32 (2H, m,  $\text{NCHCHN}$ ), 8.55 (1H, s,  $\text{NCHN}$ ). ( $\delta_H = 4.70$ , residual peak of  $\text{D}_2\text{O}$ )

**Fig. S2.** The chemical shifts of  $^1\text{H}$  NMR spectra of [EMIM][DMP] with  $\text{D}_2\text{O}$  as the external reference solvent are recorded as follows:  $\delta_H = 1.42$  (3H, t,  $\text{NCH}_2\text{CH}_3$ ), 3.48 (6H, d,  $\text{P}(\text{OCH}_3)_2$ ), 3.81 (3H, s,  $\text{NCH}_3$ ), 4.14 (2H, q,  $\text{NCH}_2\text{CH}_3$ ), 7.34 (1H, s,  $\text{NCHCHN}$ ), 7.41 (1H, s,  $\text{NCHCHN}$ ), 8.63 (1H, s,  $\text{NCHN}$ ). ( $\delta_H = 4.70$ , residual peak of  $\text{D}_2\text{O}$ )

**Fig. S3.** The chemical shifts of  $^1\text{H}$  NMR spectra of [BMIM][DMP] with  $\text{D}_2\text{O}$  as the external reference solvent are recorded as follows:  $\delta_H = 0.84$  (3H, t,  $\text{NCH}_2\text{CH}_2\text{CH}_2\text{CH}_3$ ), 1.23 (2H, sex,  $\text{NCH}_2\text{CH}_2\text{CH}_2\text{CH}_3$ ), 1.75 (2H, p,  $\text{NCH}_2\text{CH}_2\text{CH}_2\text{CH}_3$ ), 3.49 (6H, d,  $\text{P}(\text{OCH}_3)_2$ ), 3.81 (3H, s,  $\text{NCH}_3$ ), 4.12 (2H, t,  $\text{NCH}_2\text{CH}_2\text{CH}_2\text{CH}_3$ ), 7.35 (1H, s,  $\text{NCHCHN}$ ), 7.40 (1H, s,  $\text{NCHCHN}$ ), 8.63 (1H, s,  $\text{NCHN}$ ). ( $\delta_H = 4.70$ , residual peak of  $\text{D}_2\text{O}$ )

**Fig. S4.** The chemical shifts of  $^1\text{H}$  NMR spectra of [EMIM][DEP] with  $\text{D}_2\text{O}$  as the external reference solvent are recorded as follows:  $\delta_H = 1.18$  (6H, t,  $(\text{OCH}_2\text{CH}_3)_2$ ), 1.42 (3H, t,  $\text{NCH}_2\text{CH}_3$ ), 3.81 (4H, m,  $(\text{P}(\text{OCH}_2\text{CH}_3)_2)$ ), 3.85 (3H, s,  $\text{NCH}_3$ ), 4.16 (2H, m,  $\text{NCH}_2\text{CH}_3$ ), 7.34 (1H, s,  $\text{NCHCHN}$ ), 7.41 (1H, s,  $\text{NCHCHN}$ ), 8.63 (1H, s,  $\text{NCHN}$ ). ( $\delta_H = 4.70$ , residual peak of  $\text{D}_2\text{O}$ )

**Fig. S5.** The chemical shifts of  $^1\text{H}$  NMR spectra of [EEIM][DEP] with  $\text{D}_2\text{O}$  as the external reference solvent are recorded as follows:  $\delta_H = 1.17$  (6H, t,  $\text{P}(\text{OCH}_2\text{CH}_3)_2$ ), 1.42 (6H, t,  $\text{CH}_3\text{CH}_2\text{NCHNCH}_2\text{CH}_3$ ), 4.14 (4H, p,  $\text{P}(\text{OCH}_2\text{CH}_3)_2$ ), 4.15 (4H, q,  $\text{CH}_3\text{CH}_2\text{NCHNCH}_2\text{CH}_3$ ), 7.42 (2H, s,  $\text{NCHCHN}$ ), 8.69 (1H, s,  $\text{NCHN}$ ). ( $\delta_H = 4.70$ , residual peak of  $\text{D}_2\text{O}$ )

**Fig. S6.** The chemical shifts of  $^1\text{H}$  NMR spectra of [BEIM][DEP] with  $\text{D}_2\text{O}$  as the external

reference solvent are recorded as follows:  $\delta_H = 0.82$  (3H, t,  $\text{NCH}_2\text{CH}_2\text{CH}_2\text{CH}_3$ ), 1.15 (6H, t,  $\text{P}(\text{OCH}_2\text{CH}_3)_2$ ), 1.23 (2H, m,  $\text{NCH}_2\text{CH}_2\text{CH}_2\text{CH}_3$ ), 1.41 (3H, t,  $\text{NCH}_2\text{CH}_3$ ), 1.75 (2H, m,  $\text{NCH}_2\text{CH}_2\text{CH}_2\text{CH}_3$ ), 3.82 (4H, m,  $\text{P}(\text{OCH}_2\text{CH}_3)_2$ ), 4.10 (4H, m,  $\text{CH}_3\text{CH}_2\text{NCHNCH}_2\text{CH}_2\text{CH}_2\text{CH}_3$ ), 7.40 (2H, d,  $\text{NCHCHN}$ ), 8.69 (1H, s,  $\text{NCHN}$ ). ( $\delta_H = 4.70$ , residual peak of  $\text{D}_2\text{O}$ )

**Fig. S7.** The chemical shifts of  $^1\text{H}$  NMR spectra of [BMIM][DBP] with  $\text{D}_2\text{O}$  as the external reference solvent are recorded as follows:  $\delta_H = 0.85$  (9H, m,  $\text{NCH}_2\text{CH}_2\text{CH}_2\text{CH}_3$ ,  $\text{P}(\text{OCH}_2\text{CH}_2\text{CH}_2\text{CH}_3)_2$ ), 1.74 (2H, p,  $\text{NCH}_2\text{CH}_2\text{CH}_2\text{CH}_3$ ), 3.78 (4H, q,  $\text{P}(\text{OCH}_2\text{CH}_2\text{CH}_2\text{CH}_3)_2$ ), 3.82 (3H, s,  $\text{NCH}_3$ ), 4.11 (2H, t,  $\text{CH}_3\text{CH}_2\text{CH}_2\text{CH}_2\text{N}$ ), 7.36 (1H, s,  $\text{NCHCHN}$ ), 7.41 (1H, s,  $\text{NCHCHN}$ ), 8.64 (1H, s,  $\text{NCHN}$ ). ( $\delta_H = 4.70$ , residual peak of  $\text{D}_2\text{O}$ )

**Fig. S8.** The chemical shifts of  $^{13}\text{C}$  NMR spectrum of [MMIM][DMP] with  $\text{D}_2\text{O}$  as the external reference solvent are recorded as follows:  $\delta_C = 35.56$  ( $\text{H}_3\text{CNCHNCH}_3$ ), 52.69 ( $\text{P}(\text{OCH}_3)_2$ ), 123.37 ( $\text{NCHCHN}$ ), 136.51 ( $\text{NCHN}$ ).

**Fig. S9.** The chemical shifts of  $^{13}\text{C}$  NMR spectrum of [EMIM][DMP] with  $\text{D}_2\text{O}$  as the external reference solvent are recorded as follows:  $\delta_C = 91.35$  ( $\text{NCH}_2\text{CH}_3$ ), 97.47 ( $\text{NCH}_3$ ), 100.13 ( $\text{NCH}_2\text{CH}_3$ ), 102.46 ( $\text{P}(\text{OCH}_3)_2$ ), 122.48 ( $\text{NCHCHN}$ ), 122.94 ( $\text{NCHCHN}$ ), 126.45 ( $\text{NCHN}$ ).

**Fig. S10.** The chemical shifts of  $^{13}\text{C}$  NMR spectrum of [BMIM][DMP] with  $\text{D}_2\text{O}$  as the external reference solvent are recorded as follows:  $\delta_C = 12.58$  ( $\text{NCH}_2\text{CH}_2\text{CH}_2\text{CH}_3$ ), 18.71 ( $\text{NCH}_2\text{CH}_2\text{CH}_2\text{CH}_3$ ), 31.23 ( $\text{NCH}_2\text{CH}_2\text{CH}_2\text{CH}_3$ ), 35.58 ( $\text{NCH}_3$ ), 49.25 ( $\text{NCH}_2\text{CH}_2\text{CH}_2\text{CH}_3$ ), 52.72 ( $\text{P}(\text{OCH}_3)_2$ ), 122.20 ( $\text{NCHCHN}$ ), 123.46 ( $\text{NCHCHN}$ ), 135.82 ( $\text{NCHN}$ ).

**Fig. S11.** The chemical shifts of  $^{13}\text{C}$  NMR spectrum of [EMIM][DEP] with  $\text{D}_2\text{O}$  as the external reference solvent are recorded as follows:  $\delta_C = 14.45$  ( $\text{NCH}_2\text{CH}_3$ ), 15.62 ( $\text{P}(\text{OCH}_2\text{CH}_3)_2$ ), 35.55 ( $\text{NCH}_3$ ), 44.73 ( $\text{NCH}_2\text{CH}_3$ ), 62.14 ( $\text{P}(\text{OCH}_2\text{CH}_3)_2$ ), 121.85 ( $\text{NCHCHN}$ ), 123.43 ( $\text{NCHCHN}$ ), 135.52 ( $\text{NCHN}$ ).

**Fig. S12.** The chemical shifts of  $^{13}\text{C}$  NMR spectrum of [EEIM][DEP] with  $\text{D}_2\text{O}$  as the external reference solvent are recorded as follows:  $\delta_C = 14.43$  ( $\text{NCH}_2\text{CH}_3$ ), 15.57 ( $\text{P}(\text{OCH}_2\text{CH}_3)_2$ ), 44.75 ( $\text{NCH}_2\text{CH}_3$ ), 62.16 ( $\text{P}(\text{OCH}_2\text{CH}_3)_2$ ), 121.93 ( $\text{NCHCHN}$ ), 134.49 ( $\text{NCHN}$ ).

**Fig. S13.** The chemical shifts of  $^{13}\text{C}$  NMR spectrum of [BEIM][DEP] with  $\text{D}_2\text{O}$  as the external reference solvent are recorded as follows:  $\delta_C = 12.58$  ( $\text{NCH}_2\text{CH}_2\text{CH}_2\text{CH}_3$ ), 14.41 ( $\text{NCH}_2\text{CH}_3$ ), 15.55 ( $\text{P}(\text{OCH}_2\text{CH}_3)_2$ ), 18.73 ( $\text{NCH}_2\text{CH}_2\text{CH}_2\text{CH}_3$ ), 31.21 ( $\text{NCH}_2\text{CH}_2\text{CH}_2\text{CH}_3$ ), 44.75

(NCH<sub>2</sub>CH<sub>3</sub>), 49.26 (NCH<sub>2</sub>CH<sub>2</sub>CH<sub>2</sub>CH<sub>3</sub>), 62.17 (P(OCH<sub>2</sub>CH<sub>3</sub>)<sub>2</sub>), 121.93 (NCHCHN), 122.26 (NCHCHN), 134.76 (NCHN).

**Fig. S14.** The chemical shifts of <sup>13</sup>C NMR spectrum of [BMIM][DBP] with D<sub>2</sub>O as the external reference solvent are recorded as follows:  $\delta_C =$  12.59 (NCH<sub>2</sub>CH<sub>2</sub>CH<sub>2</sub>CH<sub>3</sub>), 12.99 (P(OCH<sub>2</sub>CH<sub>2</sub>CH<sub>2</sub>CH<sub>3</sub>)<sub>2</sub>), 18.35 (NCH<sub>2</sub>CH<sub>2</sub>CH<sub>2</sub>CH<sub>3</sub>), 18.71 (P(OCH<sub>2</sub>CH<sub>2</sub>CH<sub>2</sub>CH<sub>3</sub>)<sub>2</sub>), 31.24 (NCH<sub>2</sub>CH<sub>2</sub>CH<sub>2</sub>CH<sub>3</sub>), 31.99 (P(OCH<sub>2</sub>CH<sub>2</sub>CH<sub>2</sub>CH<sub>3</sub>)<sub>2</sub>), 35.58 (NCH<sub>3</sub>), 49.25 (NCH<sub>2</sub>CH<sub>2</sub>CH<sub>2</sub>CH<sub>3</sub>), 65.98 (P(OCH<sub>2</sub>CH<sub>2</sub>CH<sub>2</sub>CH<sub>3</sub>)<sub>2</sub>), 122.21 (NCHCHN), 123.47 (NCHCHN), 135.81 (NCHN).

## Legends

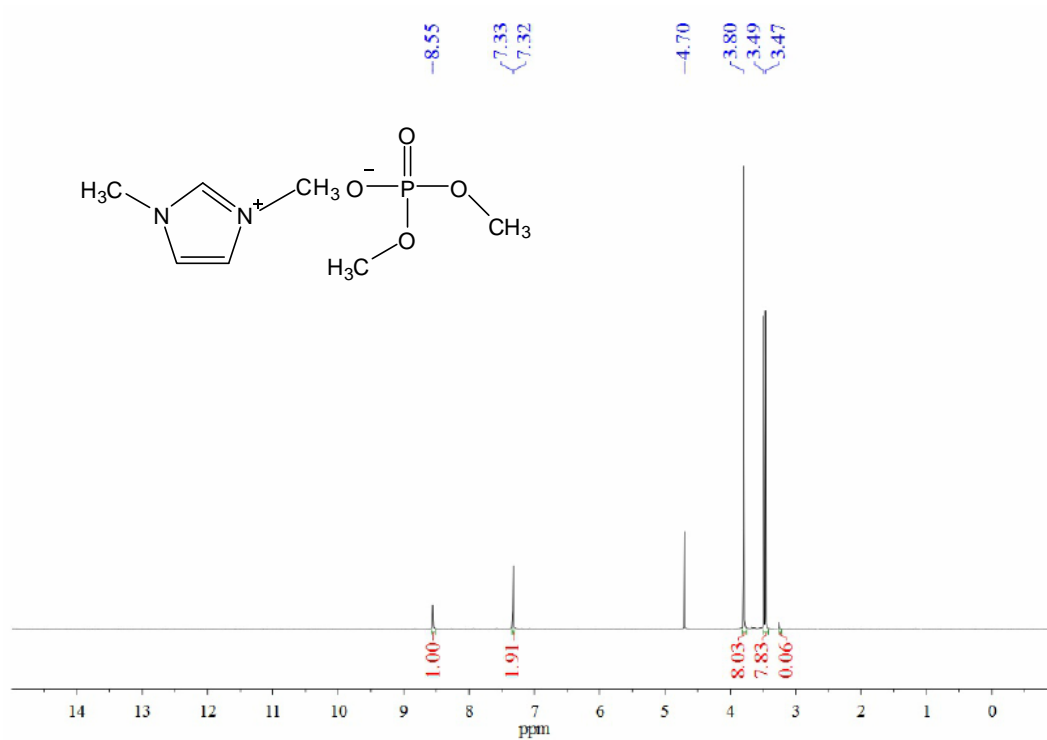

Fig. S1

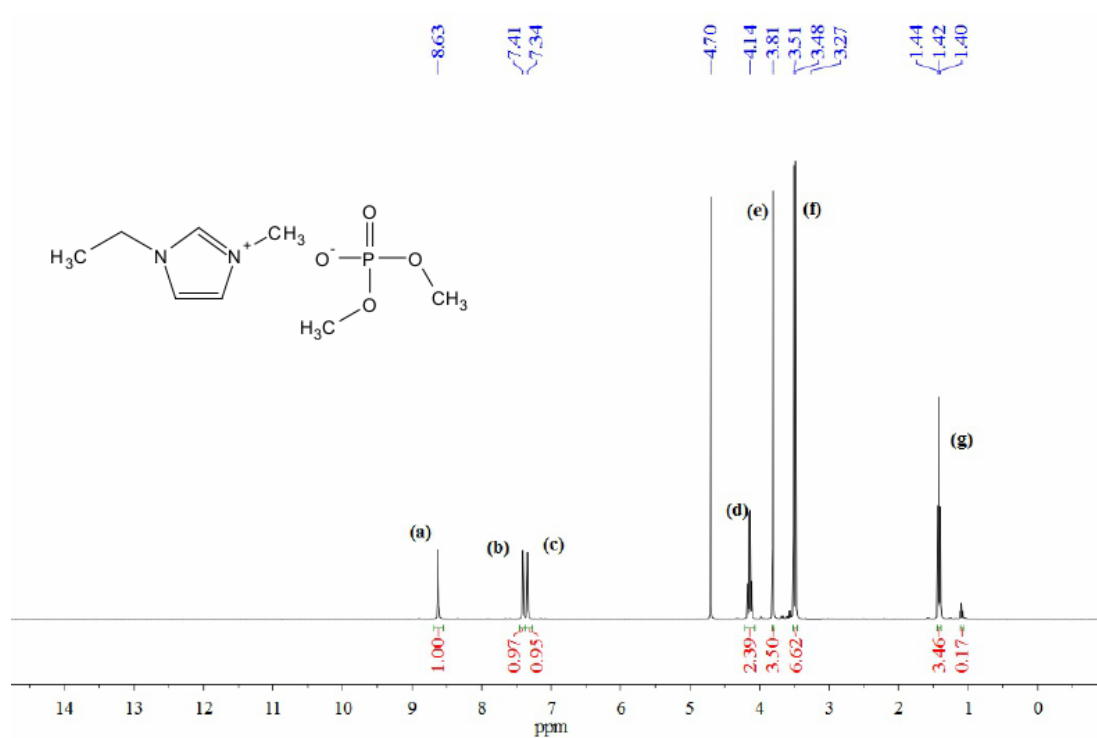

Fig. S2

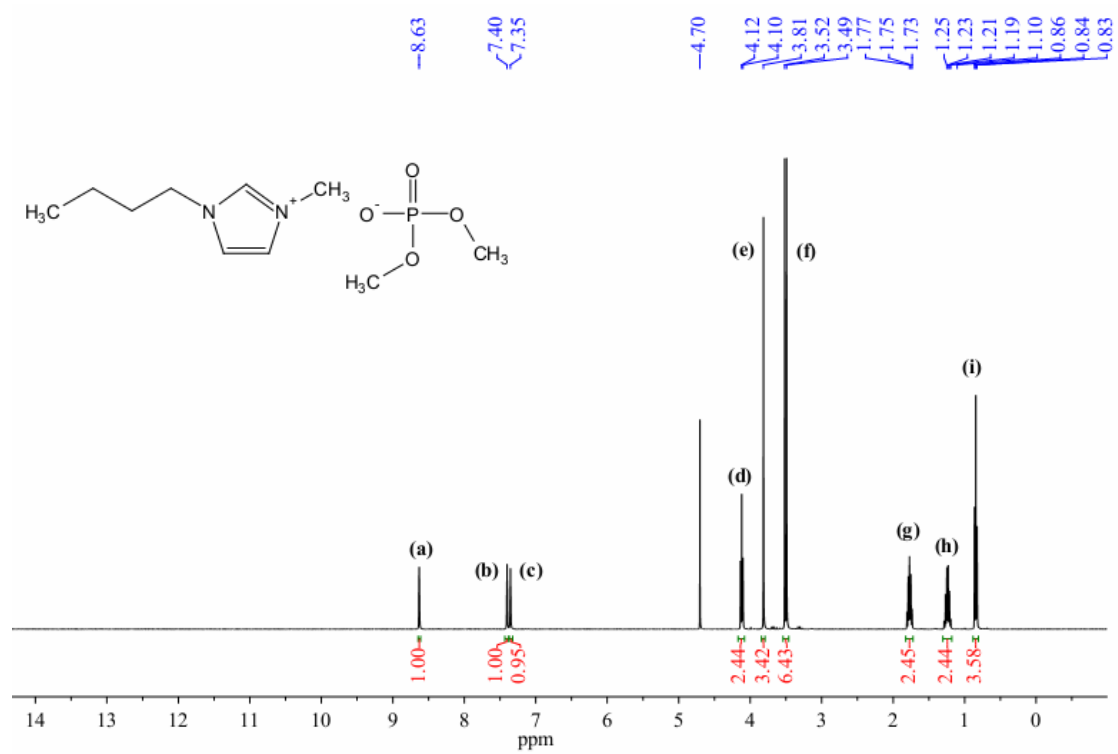

Fig. S3



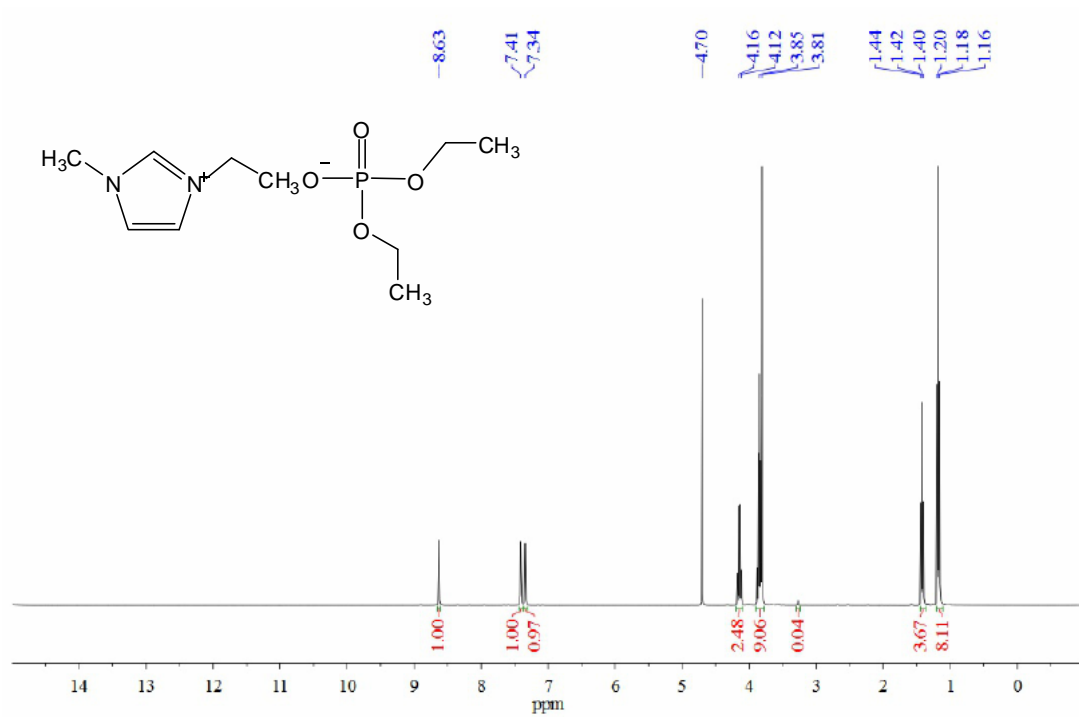

Fig. S4

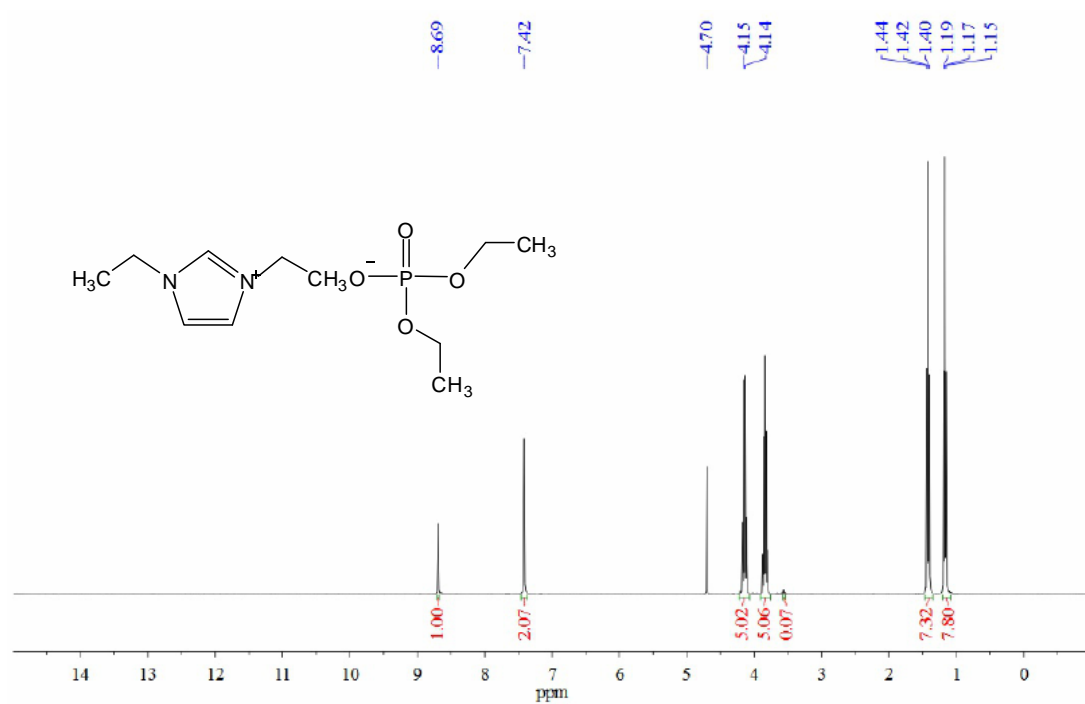

Fig. S5

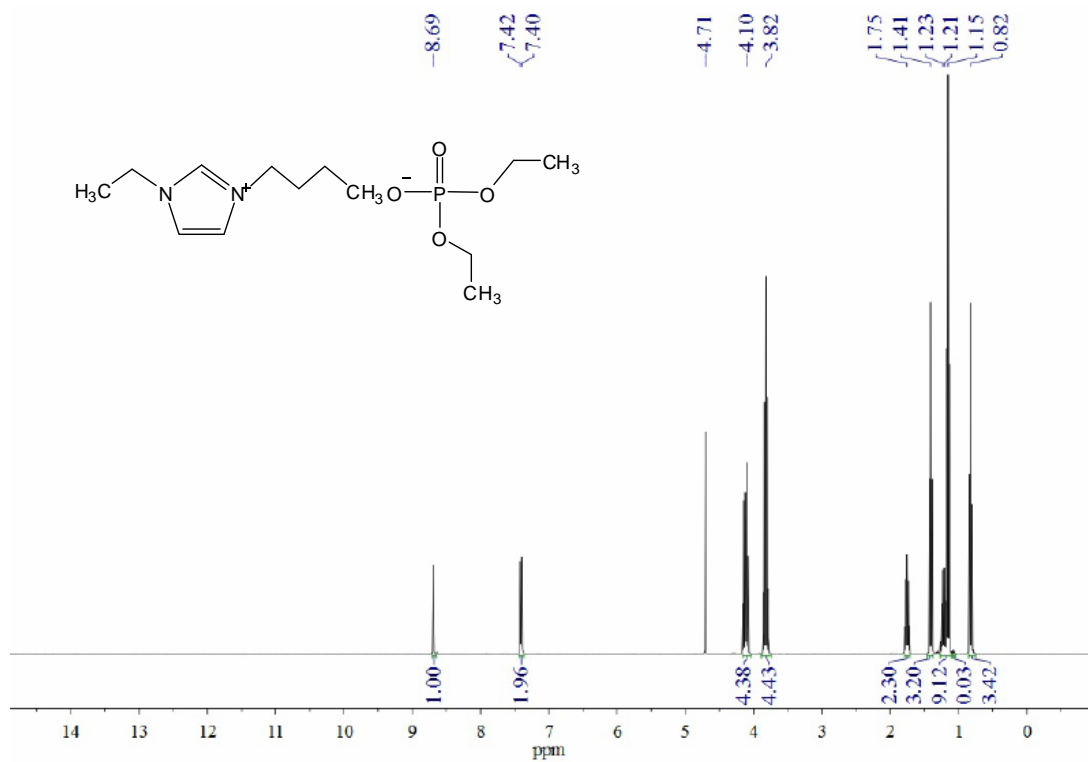

**Fig. S6**

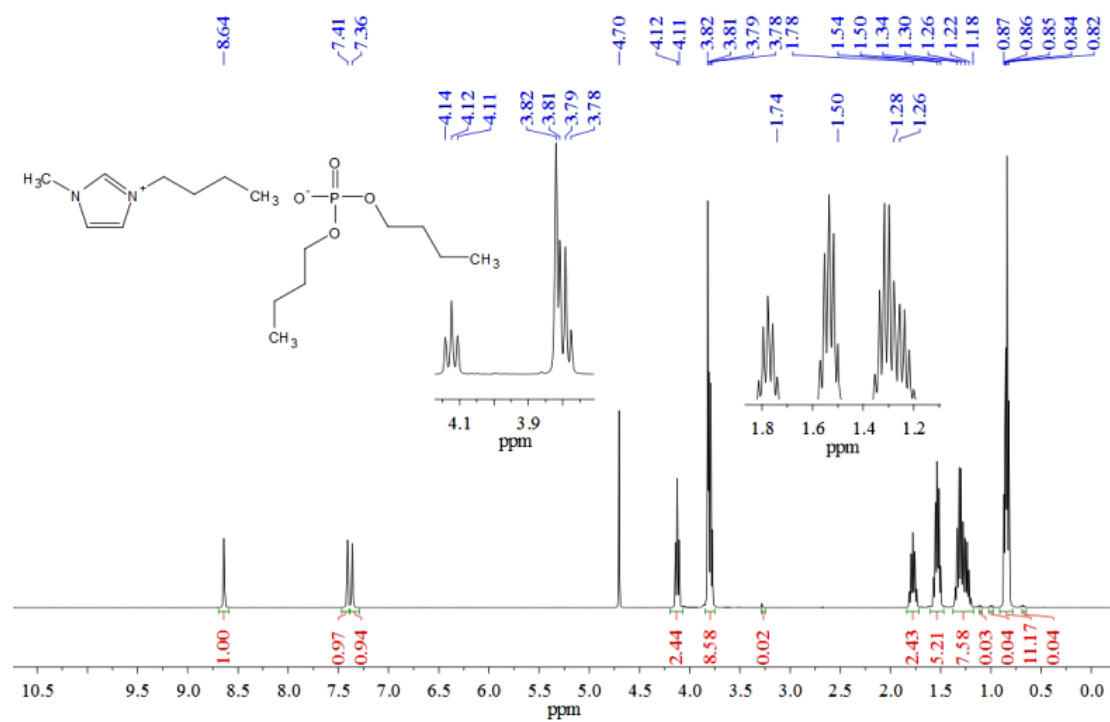

Fig. S7

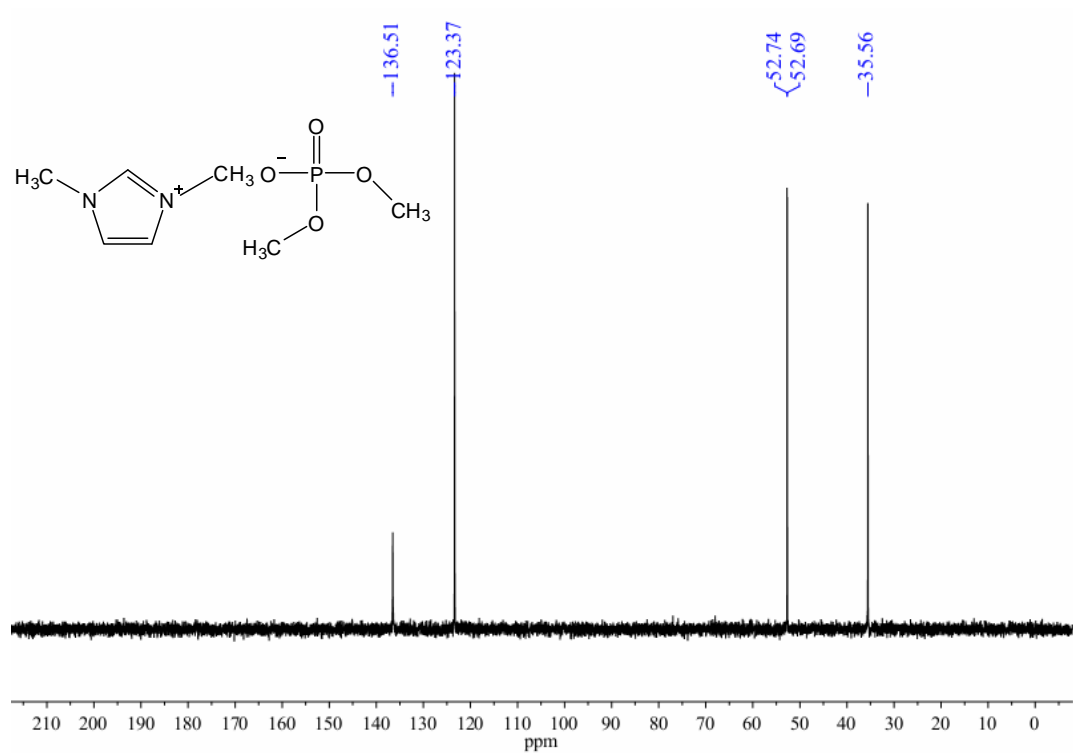

**Fig. S8**

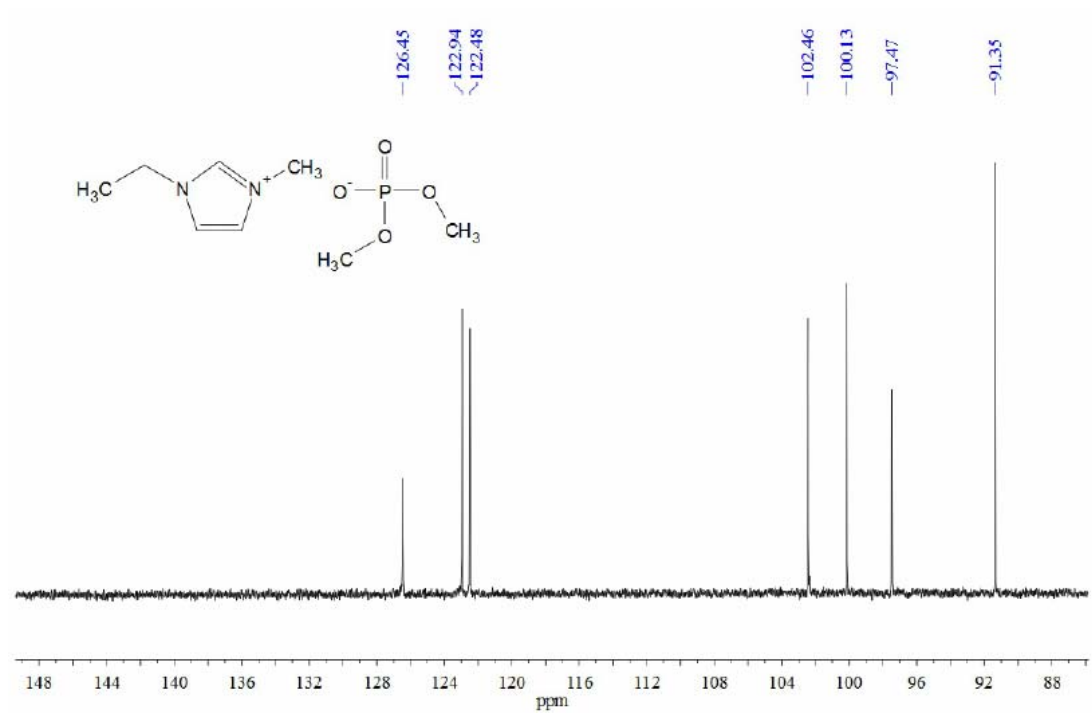

Fig. S9

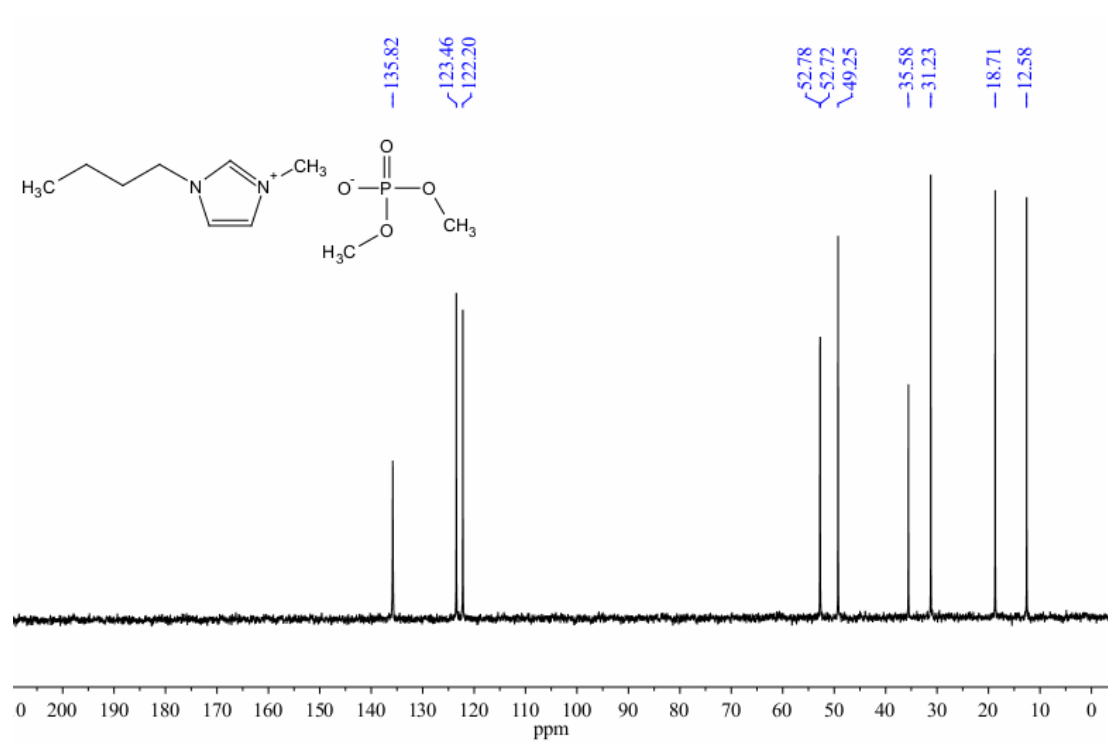

Fig. S10

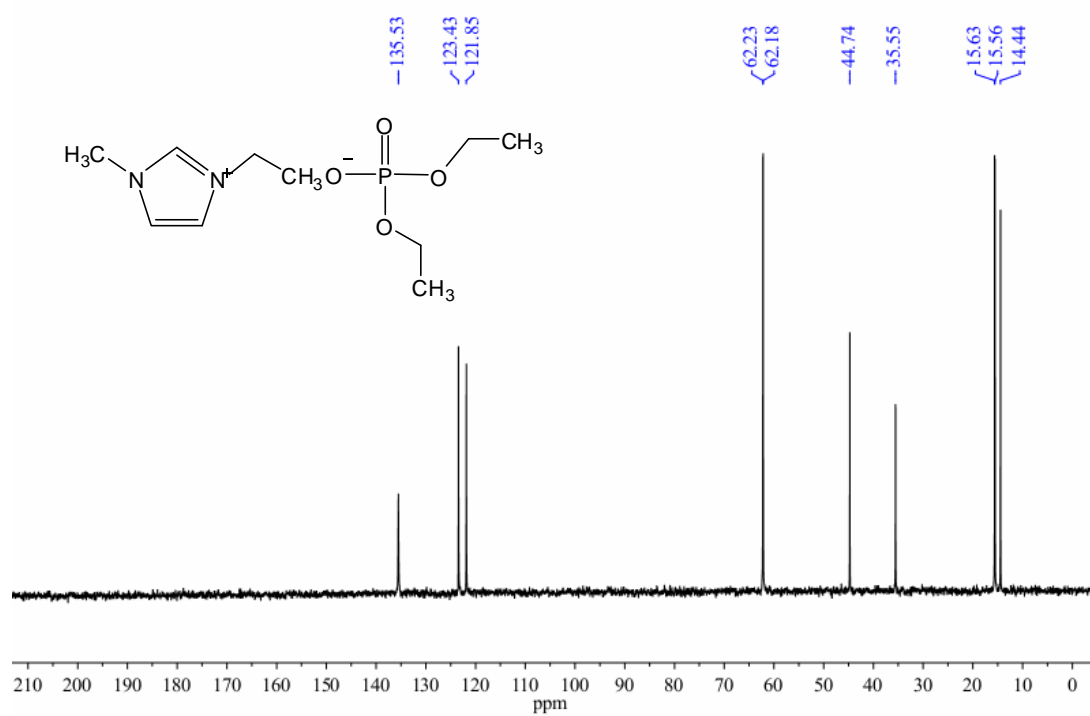

**Fig. S11**



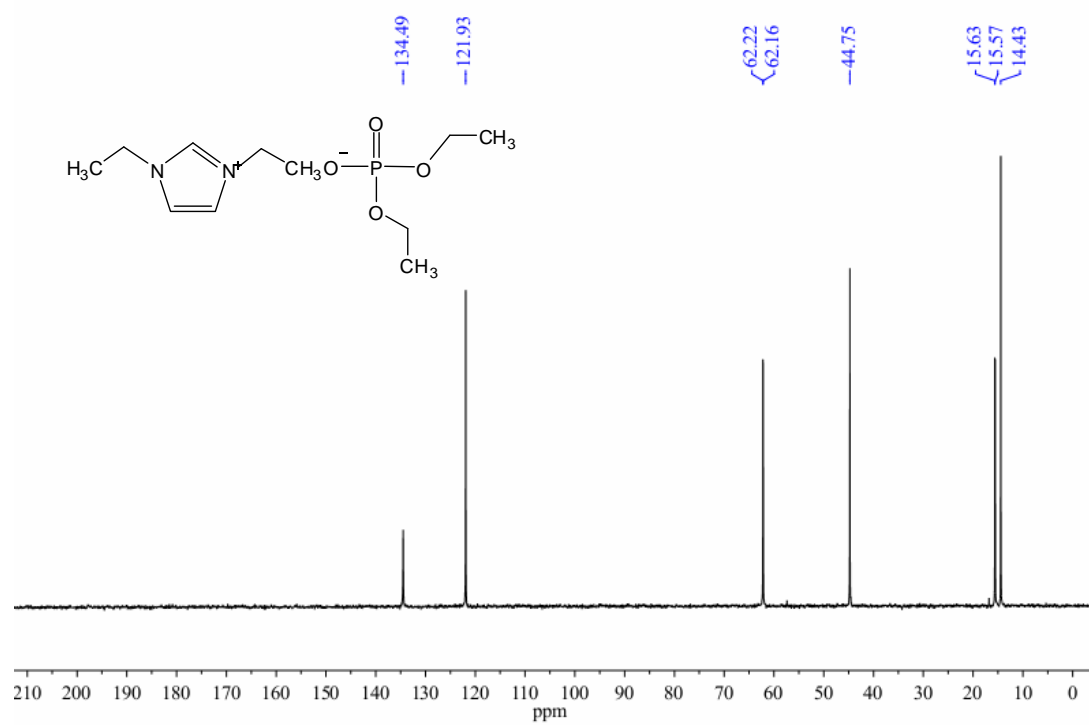

**Fig. S12**

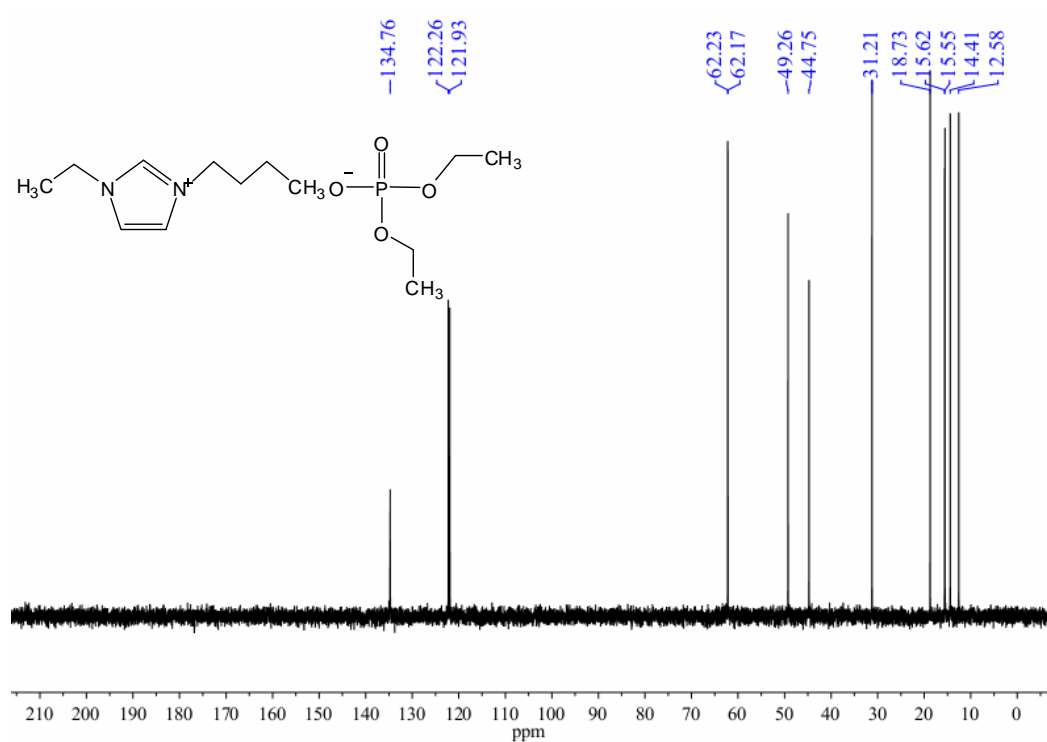

Fig. S13

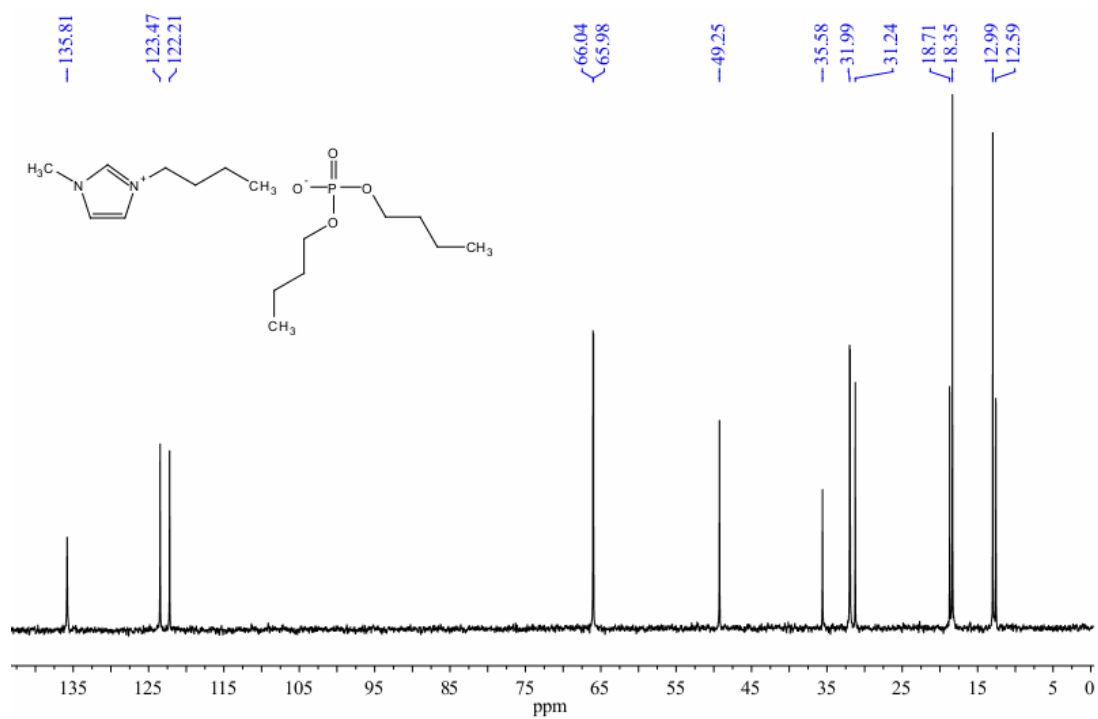

Fig. S14

## 2.2 Water content determination

Water content for the ILs is shown in **Tab. S2**.

**Tab. S2.** Water content of phosphate ionic liquids investigated

| ILs         | Water content /(ppm) |
|-------------|----------------------|
| [MMIM][DMP] | 252                  |
| [EMIM][DMP] | 334                  |
| [BMIM][DMP] | 206                  |
| [EMIM][DEP] | 328                  |
| [EEIM][DEP] | 243                  |
| [BEIM][DEP] | 281                  |
| [BMIM][DBP] | 265                  |

From **Tab. S2**, we can see there is trace amounts of water contained in any IL, and the results again indicate that the ILs have high purities.
